# Supplementary material
Source: publisher figshare collection journal article supplement (https://sage.figshare.com/ndownloader/files/18724946)
Supplement: Supplementary file 1 [file 18724946]

**Supplementary Document 1 - IBC Program Benchmark Survey Questions**

We are conducting this benchmarking exercise to compare the size, scope, and organization of IBC and biosafety programs. Please assist our efforts by completely this brief survey. Answer each question to the best of your ability, choosing the most applicable response (estimated numbers are okay). Thank you for your participation!!

**Your institution**

1. What type of research institution? (choose one)
   1. Academic
   2. Government
   3. Hospital
   4. Private
   5. Other…
2. 2016 Total Research Expenditures ($1,000,000)

**Organizational structure**

1. Which Administrative unit does your IBC report to (please check the most directly applicable)?
   1. Vice President for Research
   2. Research Integrity Office
   3. Environmental Health & Safety
   4. Sponsored Programs
   5. Other…
2. Which Administrative unit does your BSO report to (please check the most directly applicable)?
   1. Vice President for Research
   2. Research Integrity Office
   3. Environmental Health & Safety
   4. Sponsored Programs
   5. Other…
3. Which Administrative unit does your IACUC report to (please check the most directly applicable)?
   1. Vice President for Research
   2. Research Integrity Office
   3. Environmental Health & Safety
   4. Sponsored Programs
   5. Other…
4. Which Administrative unit does your IRB report to (please check the most directly applicable)?
   1. Vice President for Research
   2. Research Integrity Office
   3. Environmental Health & Safety
   4. Sponsored Programs
   5. Other…

**Your IBC**

1. What type of research does your IBC review? (check all that apply)
   1. rDNA/gene editing
   2. human pathogens
   3. animal pathogens
   4. plant pathogens
   5. select agents
   6. biological toxins
   7. human samples/blood borne pathogens
   8. nanoparticles
   9. Other…
2. Number of PIs with IBC Approval
3. Total Number of active IBC protocols
   1. Number of BSL3 Protocols
   2. Number of BSL1/2 Protocols
4. Are your IBC protocols/approvals program based or project based (i.e., does a whole lab/program receive IBC approval or does each individual project receive IBC approval)?
   1. Program based
   2. Project based
   3. Other…
5. Does your IBC require registration/approval of exempt rDNA work (i.e., work that is exempt from the NIH Guidelines)? Yes/No

**Lab space**

1. Square footage of BSL3 lab space
2. Square footage of BSL1/2 lab space

**Select Agents**

1. Select Agents use? Yes/No (if no, please skip to 15)
   1. Who is (what position serves as) the RO?
   2. Who is (what position servers as) the ARO?

**Lab Audits**

1. What type of event primarily triggers a lab audit?
   1. New protocol submission
   2. Routine check
   3. Lab incident
   4. Other…

**IBC/Biosafety Staff**

1. Number of Biosafety Officer/Asst BSO FTE
2. Number of IBC Admin/Coordinator FTE
3. Other biosafety staff (i.e., OccHealth)?

**IACUC and IRB activity**

1. Number of active IACUC protocols
2. Number of IACUC Admin/Coordinator FTE
3. Number of active IRB protocols
4. Number of IRB Admin/Coordinator FTE
5. What percentage of protocols require multiple bioethics committee reviews (i.e., protocols reviewed by more than one committee)?
   1. IBC/IACUC
   2. IBC/IRB7
   3. IBC/IACUC/IRB

**IBC and GxP**

1. Do any of your IBC protocols adhere to GCP/GLP/GMP (i.e. GxP), and how is this managed?
   1. We do not have any IBC protocols that require adherence to GxP
   2. We have some which require GxP; these are managed at the PI level
   3. We have some which require GxP; these are managed at the PI level with some support/oversight and monitoring by the Vice President for Research (or Provost’s) office
   4. We have some which require GxP; these are managed at the PI level with some support/oversight and monitoring by a 3rd party (consultancy, outside vendor)
   5. We have some which require GxP; managed by c) or d) above
   6. We have some which require GxP; these are all managed and monitored by the Vice president for Research/Provost, or outside vendor

**Optional**

Please provide contact information if you wish to receive notification of the survey results (this may also be used should follow up questions arise):

**Any additional comments?**

**Thank you for your participation!!**
